# Supplementary material for: Simultaneous determination of ascorbic acid, dopamine and uric acid at a nitrogen-doped carbon nanofiber modified electrode
Source: Royal Society of Chemistry journal article supplement (doi:10.1039/c4ra13857k), 2015-01-01
Supplement: c4ra13857k1.pdf [file c4ra13857k1.pdf]

Electronic Supporting Information

**Simultaneous determination of ascorbic acid, dopamine and uric acid at nitrogen-doped carbon nanofiber modified electrode**

Jinying Sun<sup>a</sup>, Libo Li<sup>b</sup>, Xueping Zhang<sup>b</sup>, Dong Liu<sup>b</sup>, Simin Lv<sup>a</sup>, Derong Zhu<sup>a</sup>,  
Tie Wu<sup>a\*</sup> and Tianyan You<sup>b\*</sup>

<sup>a</sup>School of Pharmacy, Guangdong Medical College, Dongguan 523808, China

<sup>b</sup>State Key Laboratory of Electroanalytical Chemistry, Changchun Institute of Applied Chemistry, Chinese Academy of Sciences, Changchun 130022, China

<sup>a\*</sup>Corresponding author, Email: wutie2@163.com (T. Wu), Tel: +86-769-22896547

<sup>b\*</sup>Corresponding author, Email: youty@ciac.ac.cn (T. Y. You), Tel: +86-431-85262850

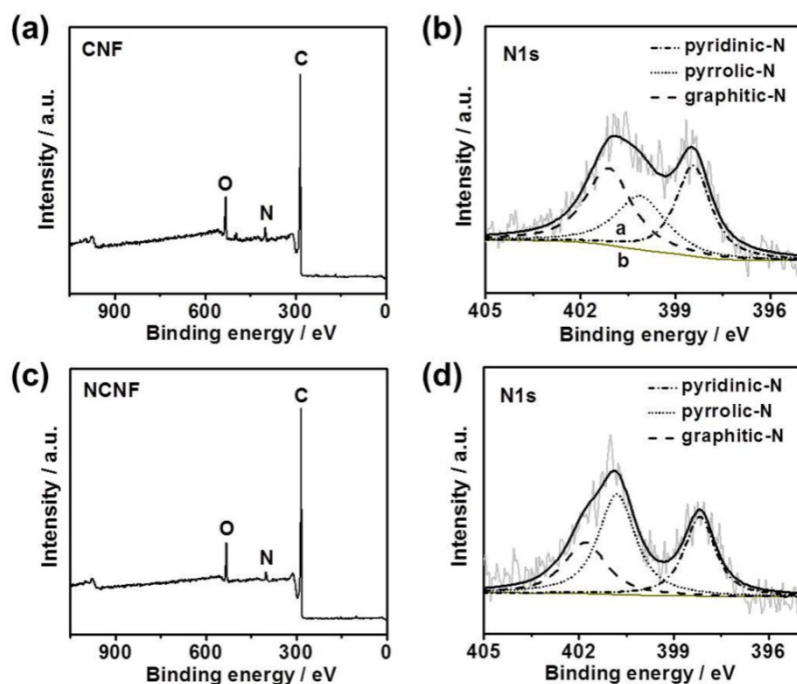

Figure S1. XPS survey spectra of CNF (a) and NCNF (b), and N1s spectra of CNF (c) and NCNF (d).

XPS results reveal that the content of nitrogen in NCNF is lower than that in CNF. However, the percentage of pyrrolic-N in NCNF (44.5%) is much higher than that of CNF (28.6%). The presence of high content of pyrrolic-N on the surface of NCNF may contribute to its excellent electrocatalytic activity.<sup>1, 2</sup>

## References

- 1 V. V. Strelko, V.S. Kuts, P.A. Thrower, *Carbon*, 2000, **38**, 1499.
- 2 D. Liu, X. P. Zhang, Z. C. Sun and T. Y. You, *Nanoscale*, 2013, **5**, 9528.
